# Supplementary material for: Planning virtual and hybrid events: steps to improve inclusion and accessibility
Source: Copernicus journal article supplement (doi:10.5194/egusphere-2023-2939), 2023-12-20
Supplement: Supplementary file 1 [file egusphere-2023-2939-supplement.pdf]

## Supplementary Material

| Article database                  | Title search string                                 | No. articles returned | URL                                                                                                                                                                                                                                                   |
|-----------------------------------|-----------------------------------------------------|-----------------------|-------------------------------------------------------------------------------------------------------------------------------------------------------------------------------------------------------------------------------------------------------|
| Web of Science                    | TI = (virtual NEAR/2 (conference))                  | 279                   | <a href="https://www.webofscience.com/wos/woscc/summary/34d65657-2bcc-4ccd-9d19-fed132875b10-a09b93d9/date-descending/1">https://www.webofscience.com/wos/woscc/s<br/>ummary/34d65657-2bcc-4ccd-9d19-<br/>fed132875b10-a09b93d9/date-descending/1</a> |
| Web of Science                    | TI = (online NEAR/2 (conference))                   | 228                   | <a href="https://www.webofscience.com/wos/woscc/summary/14c5c961-36df-4f87-9f56-0fea450842e3-a09bc6f0/date-descending/1">https://www.webofscience.com/wos/woscc/s<br/>ummary/14c5c961-36df-4f87-9f56-<br/>0fea450842e3-a09bc6f0/date-descending/1</a> |
| Web of Science                    | TI = ((virtual NEAR/2 (conference)) AND inclusive)  | 1                     | <a href="https://www.webofscience.com/wos/woscc/summary/2adccb52-bb1c-4a4f-849b-7aa1341a927a-a09bff2d/date-descending/1">https://www.webofscience.com/wos/woscc/s<br/>ummary/2adccb52-bb1c-4a4f-849b-<br/>7aa1341a927a-a09bff2d/date-descending/1</a> |
| Web of Science                    | TI = ((virtual NEAR/2 (conference)) AND accessible) | 0                     | <a href="https://www.webofscience.com/wos/woscc/summary/5b9827b0-769e-4e76-9abd-20606eb57f03-a09c0ad4/date-descending/1">https://www.webofscience.com/wos/woscc/s<br/>ummary/5b9827b0-769e-4e76-9abd-<br/>20606eb57f03-a09c0ad4/date-descending/1</a> |
| Directory of Open Access Journals | 'virtual' AND 'conference'                          | 76                    | <a href="https://bit.ly/3YZhpvL">https://bit.ly/3YZhpvL</a>                                                                                                                                                                                           |
| Directory of Open Access Journals | 'online' AND 'conference'                           | 59                    | <a href="https://bit.ly/3R7jDY7">https://bit.ly/3R7jDY7</a>                                                                                                                                                                                           |
| Directory of Open Access Journals | 'virtual' AND 'conference' AND inclusiv*            | 1                     | <a href="https://bit.ly/3Z6qDXm">https://bit.ly/3Z6qDXm</a>                                                                                                                                                                                           |
| Directory of Open Access Journals | 'online' AND 'conference' AND inclusiv*             | 0                     | <a href="https://bit.ly/3PnaMA8">https://bit.ly/3PnaMA8</a>                                                                                                                                                                                           |
| Directory of Open Access Journals | 'virtual' AND 'conference' AND accessib*            | 0                     | <a href="https://bit.ly/3EnrCIW">https://bit.ly/3EnrCIW</a>                                                                                                                                                                                           |
| Directory of Open Access Journals | 'online' AND 'conference' AND accessib*             | 0                     | <a href="https://bit.ly/3qWSfRX">https://bit.ly/3qWSfRX</a>                                                                                                                                                                                           |

Table 1: online article database search results used to construct the time series of published articles in Fig. 1.

| <b>Virtual conference-related search terms</b> | <b>EDI-related search terms</b> |
|------------------------------------------------|---------------------------------|
| online conference                              | alt image text                  |
| online meeting                                 | alt text                        |
| virtual conference                             | diversity                       |
| web conferencing                               | inclusivity                     |
| Zoom                                           | equity                          |
| MS Teams                                       | equidad                         |

Table 2: google trends search terms which were aggregated to produce the graph of searches in Fig. 2.
